# Supplementary material for: High growth per cycle thermal atomic layer deposition of Ni films using an electron-rich precursor
Source: Royal Society of Chemistry journal article supplement (doi:10.1039/c8nr08040b), 2018-12-03
Supplement: c8nr08040b1.pdf [file c8nr08040b1.pdf]

**Electronic Supplementary Information for:**

**High growth per cycle thermal atomic layer deposition of Ni films using an electron-rich precursor†**

Yuxiang Zhang,<sup>a</sup> Liyong Du,<sup>a</sup> Xinfang Liu<sup>b</sup> and Yuqiang Ding<sup>\*a</sup>

<sup>a</sup> International Joint Research Center for Photoresponsive Molecules and Materials, School of Chemical and Material Engineering, Jiangnan University, 1800 Lihu Road, Wuxi 214122, P. R. China

<sup>b</sup> Henan Key Laboratory of Function-Oriented Porous Materials, College of Chemistry and Chemical Engineering, Luoyang Normal University, Luoyang 471934, P.R. China

\*E-mail: yding@jiangnan.edu.cn

## Experimental section

All manipulations and reactions were carried out using standard Schlenk techniques or in a glovebox under nitrogen atmosphere. Toluene and hexane were freshly distilled from Na prior to use. Ni(acac)<sub>2</sub> (**1**) was purchased from J&K Chemical and used without further purification. Ni(acac)<sub>2</sub>(tmeda) (**2**), Ni(acac)<sub>2</sub>(py)<sub>2</sub> (**3**), Ni(acac)<sub>2</sub>(pipz) (**4**), Ni(acac)<sub>2</sub>(dppe) (**5**), Ni(acac)<sub>2</sub>(pph<sub>3</sub>)<sub>2</sub>, and Ni(acac)<sub>2</sub>(γ-pico) was synthesized according to the literature.<sup>1-4</sup> Anhydrous hydrazine (N<sub>2</sub>H<sub>4</sub>) was purified from hydrazine hydrate. Nickel powder (99.9%) was purchased from J&K Chemical and annealed at 600 °C for 12 h in the forming gas (N<sub>2</sub>/10%-H<sub>2</sub>) prior to use.

The thermal properties of compounds were analyzed by an STA 449 F3 analyzer in argon at a heating rate of 10 °C min<sup>-1</sup> from 30 to 600 °C. The thermal chemistry of selected compounds were studied by a Thermo Fisher Scientific Nicolet 6700 attenuated total internal reflectance fourier transform infrared spectroscopy (ATR-FTIR). The samples for measurement were prepared through sufficient vapor of compounds adsorb on nickel powder under different deposition temperature in a thermal ALD reactor. The sublimation temperatures of Ni(acac)<sub>2</sub>(tmeda), Ni(acac)<sub>2</sub>, Ni(acac)<sub>2</sub>(py)<sub>2</sub> and Ni(acac)<sub>2</sub>(dppe) were kept at 95 °C, 150 °C, 130 °C and 150 °C, respectively.

The ALD of nickel films were deposited on SiO<sub>2</sub>/Si(100) substrates and the substrates were ultrasonically cleaned in acetone, isopropanol and deionized water in sequence prior to ALD. The SiO<sub>2</sub> thickness was about 100 nm, which is a thickness sufficient to avoid the formation of silicides.<sup>5</sup>

A thermal ALD reactor (MNT f-150-212) was employed for depositing. The sublimation temperatures of Ni(acac)<sub>2</sub>(tmeda), Ni(acac)<sub>2</sub>(py)<sub>2</sub> and N<sub>2</sub>H<sub>4</sub> were maintained at 95 °C, 130 °C and 40 °C, respectively. The working pressure was kept at 50-60 Pa under a flow of nitrogen (99.999%), and nitrogen was also used as both the carrier and purge gas. The substrate temperature was investigated at 220-300 °C for Ni(acac)<sub>2</sub>(tmeda) and 200-300 °C for Ni(acac)<sub>2</sub>(py)<sub>2</sub>. One ALD cycle include alternate pulses of precursor (Ni(acac)<sub>2</sub>(tmeda) or Ni(acac)<sub>2</sub>(py)<sub>2</sub>) (pulse time t<sub>s</sub>) and reducing agent (N<sub>2</sub>H<sub>4</sub>) (pulse time t<sub>r</sub>), separated by a purge time (t<sub>p</sub>) which was fixed at 20 s. The modified ALD process, which was used to verify the “anchoring” mechanism, was described as follows: the initially thin Ni layer deposition (Ni(acac)<sub>2</sub>(tmeda) (10 s) – purge (20 s) – hydrazine (2 s) – purge (20 s), 30 ALD cycles), subsequently, the modified ALD mode (tmeda (2 s) – purge (20 s) – Ni(acac)<sub>2</sub>(tmeda) (10 s) – purge (20 s) – hydrazine (2 s) – purge (20s), 470 ALD cycles) was performed.

The surface morphology and thickness of the films were studied by a Bruker Multimode 8 atomic force microscopy (AFM), a Hitachi S-4800 scanning electron microscopy (SEM) and a Bruker D8 X-ray reflection (XRR). The growth per cycle (GPC) value of process was calculated by divide film thickness by the number of deposition cycles. The composition and the crystalline phase of films were analysed using a Thermo ESCALAB 250Xi X-ray photoelectron spectroscopy (XPS) and a Bruker D8 X-ray diffraction (XRD). The resistivity of films was measured by four-point-probe measurements.

## Thermal properties of electron-rich nickel compounds

Table S1. Thermal properties of several reported electron-rich nickel compounds.

| Compound <sup>[a]</sup>                                | Volatilization temperature (°C) | Reference |
|--------------------------------------------------------|---------------------------------|-----------|
| Ni(acac) <sub>2</sub> (γ-pico)                         | 201-295                         | ---       |
| Ni(acac) <sub>2</sub> (pipz)                           | 183-313                         | ---       |
| Ni(acac) <sub>2</sub> (py) <sub>2</sub>                | 199-303                         | ---       |
| Ni(acac) <sub>2</sub> (teen)                           | 95-322                          | 6         |
| Ni(acac) <sub>2</sub> ( <i>unsym</i> -dmen)            | 135-230                         | 6         |
| Ni(acac) <sub>2</sub> (tmeda)                          | 114-208                         | ---       |
| Ni(acac) <sub>2</sub> (pph <sub>3</sub> ) <sub>2</sub> | 233-286                         | ---       |
| Ni(acac) <sub>2</sub> (dppe)                           | 238-341                         | ---       |

<sup>a</sup> Abbreviations: acac, acetylacetonate; γ-pico, 4-methylpyridine; pipz, piperazine; py, pyridine; teen, N,N,N',N'-tetraethylethylenediamine; *unsym*-dmen, N,N-diethylethylenediamine; tmeda, N,N,N',N'-tetramethylethylenediamine; pph<sub>3</sub>, triphenylphosphine; dppe, 1,2-bisdiphenyl-phosphinoethane.

Cross sectional SEM image of Ni film grown by thermal ALD using  $\text{Ni}(\text{acac})_2(\text{tmeda})$  and  $\text{N}_2\text{H}_4$  under different deposition temperature

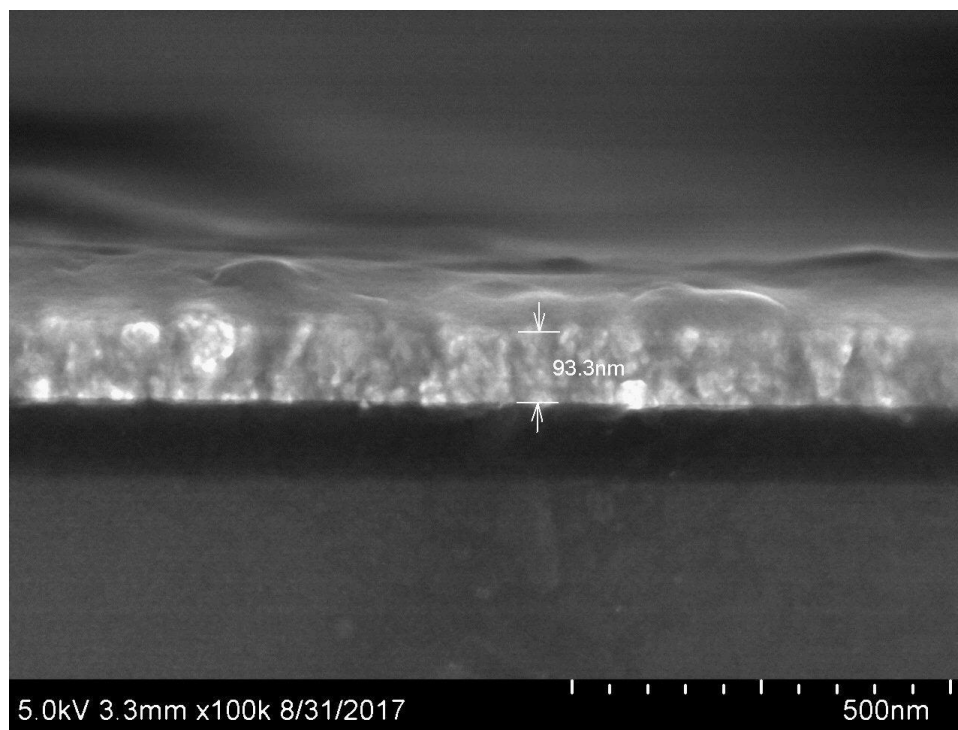

Fig. S1(a) Cross sectional SEM image of the film deposited at 220 °C by 500 cycles.

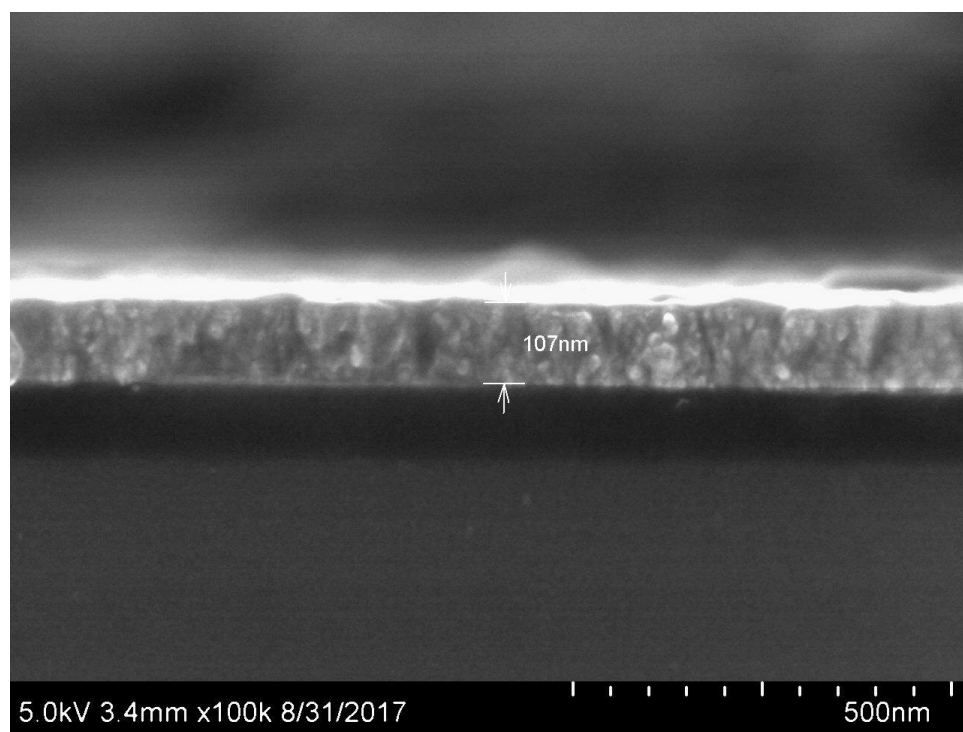

Fig. S1(b) Cross sectional SEM image of the film deposited at 240 °C by 500 cycles.

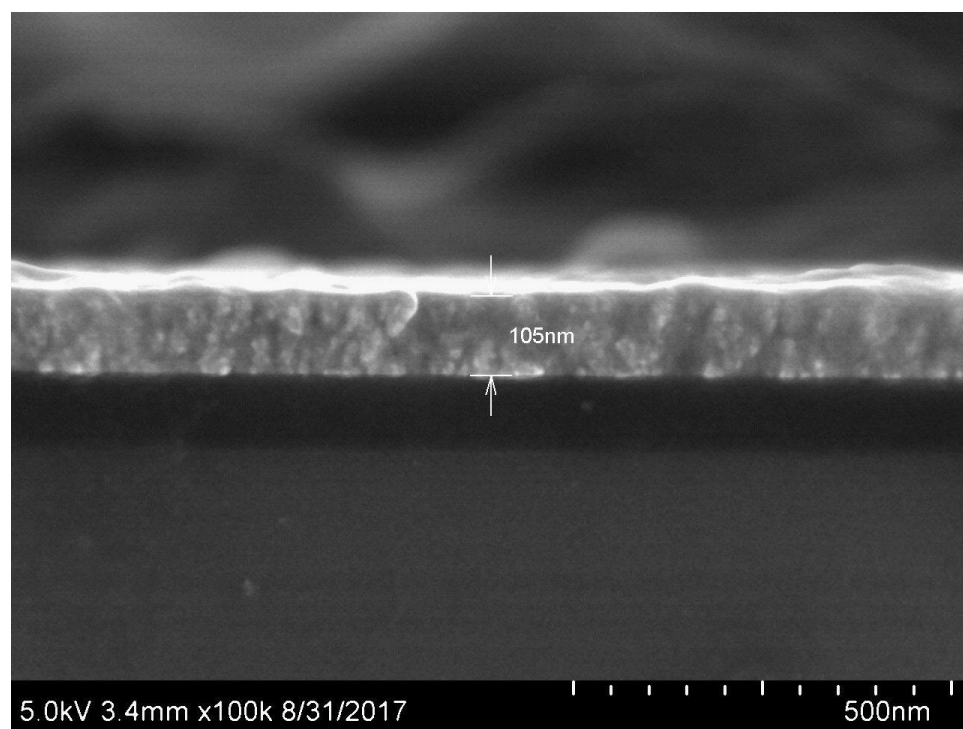

Fig. S1(c) Cross sectional SEM image of the film deposited at 260 °C by 500 cycles.

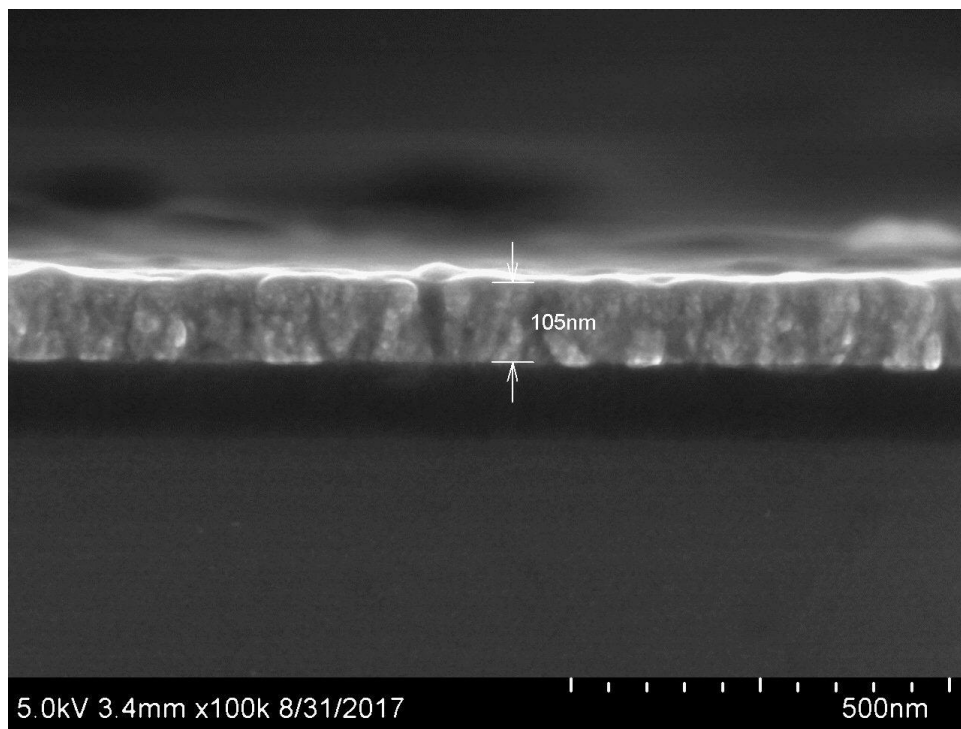

Fig. S1(d) Cross sectional SEM image of the film deposited at 280 °C by 500 cycles.

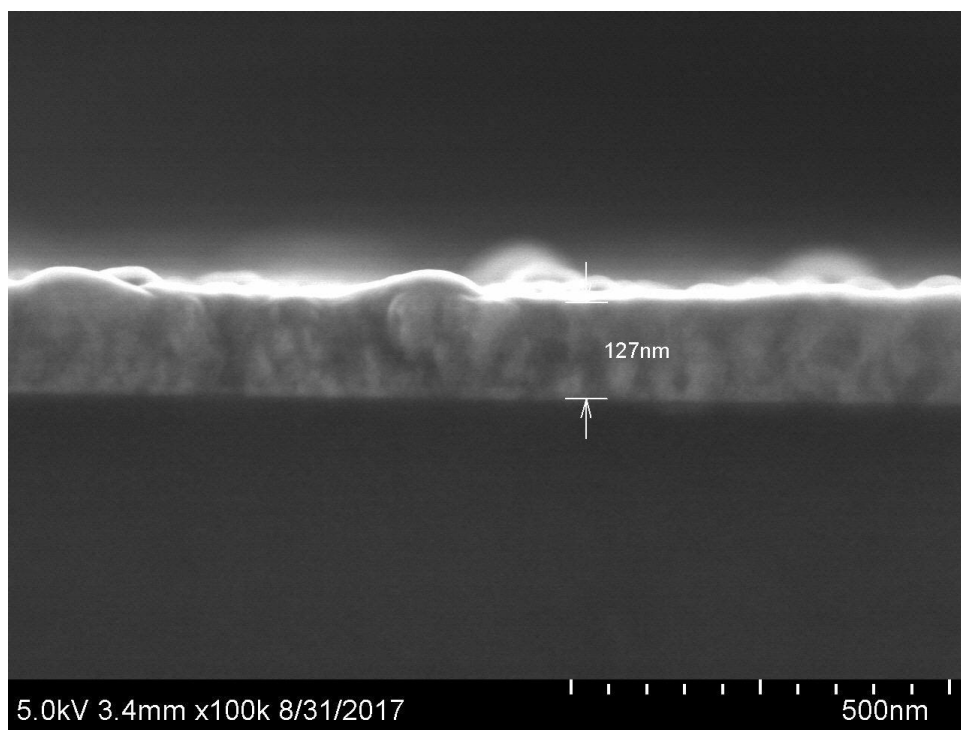

Fig. S1(e) Cross sectional SEM image of the film deposited at 300 °C by 500 cycles.

### Resistivity of Ni film grown at different deposition temperatures

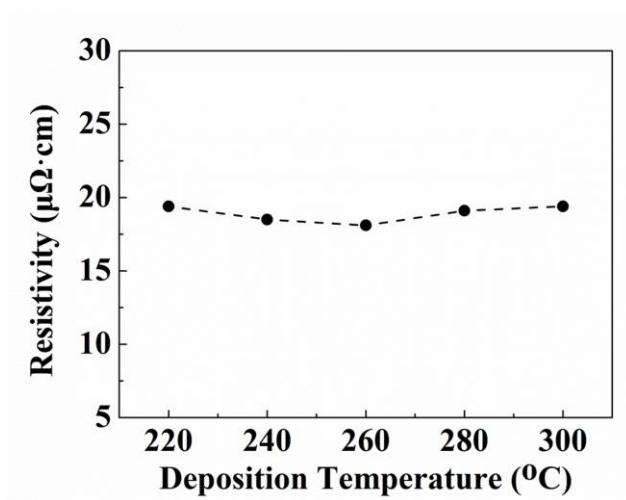

Fig. S2 Resistivity of Ni film as a function of deposition temperature at a fixed  $\text{Ni}(\text{acac})_2(\text{tmeda})$  pulse time of 10 s and  $\text{N}_2\text{H}_4$  pulse time of 2 s.

### XPS of Ni film grown by thermal ALD using $\text{Ni}(\text{acac})_2(\text{tmeda})$ and $\text{N}_2\text{H}_4$

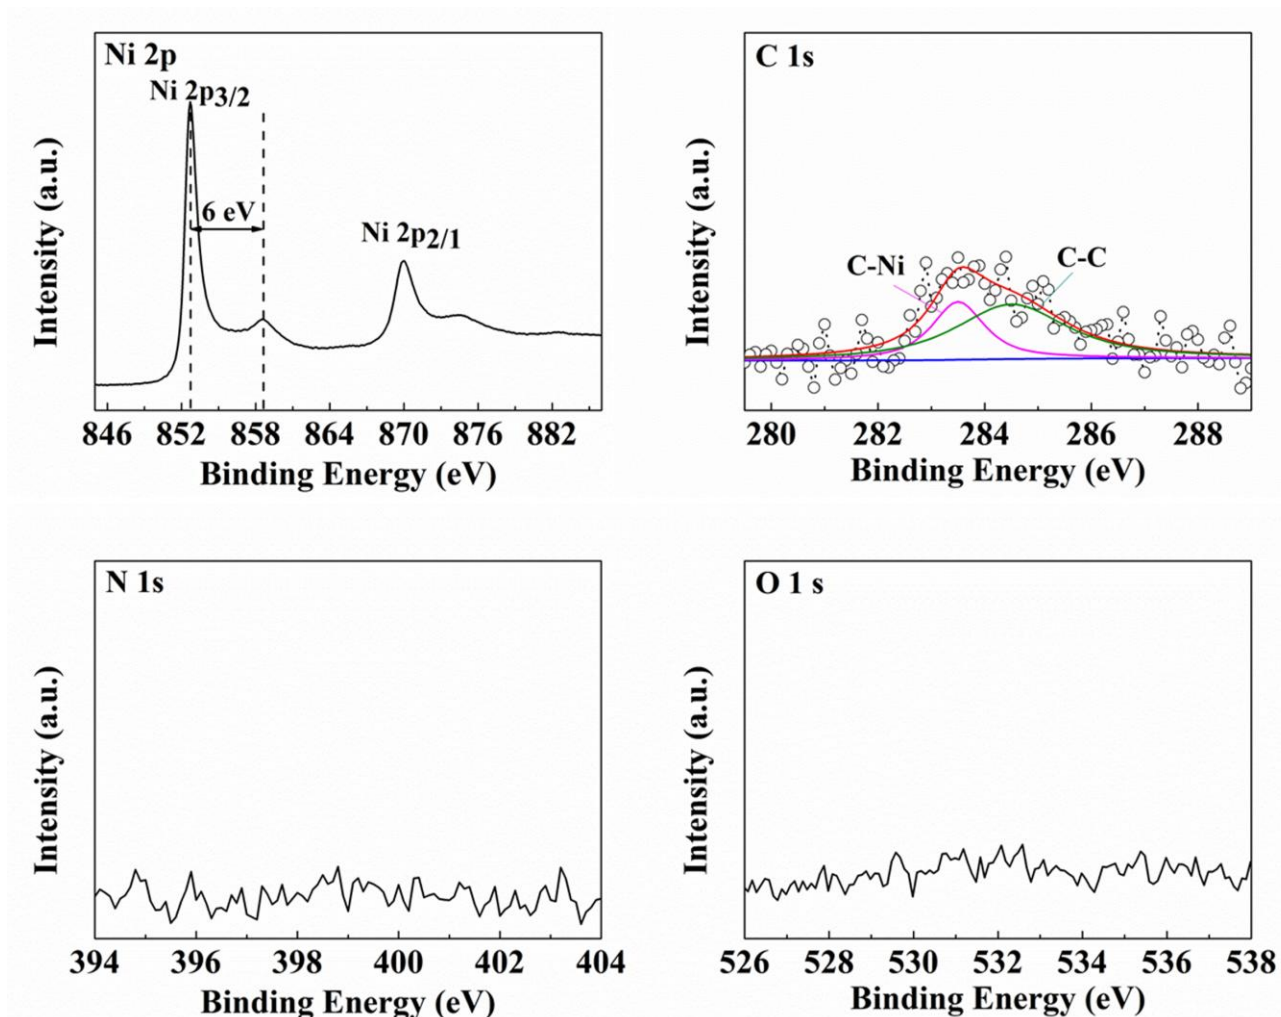

Fig. S3 Ni 2p, C 1s, N 1s and O 1s XPS spectra of Ni film grown at 260 °C.

The composition of 100 nm nickel film grown at 260 °C was studied by X-ray photoelectron spectroscopy (XPS). The deposited film is composed of Ni content (95.1%), few C content and a negligible amount of N and O after in situ Ar ion etching for 30 s. Ni 2p<sub>3/2</sub> and Ni 2p<sub>2/1</sub> peaks of metallic Ni are observed at 852.7 eV and 870.0 eV, and a satellite peak of Ni 2p<sub>3/2</sub> is observed at 858.7 eV that is due to surface plasmon loss and interband transitions effect.<sup>7,8</sup> Moreover, the C 1s spectrum can be divided into two peaks by Gaussian–Lorentzian function, each of which can be attributed to C-Ni at 283.5 eV and C-C at 284.5 eV, respectively.<sup>9</sup> And the small carbon content of film is possibly introduced by incorporation of the produced byproducts into the film in the deposition process, and then forms bonding of Ni and C element.<sup>10</sup>



## SEM and AFM images of Ni film grown by thermal ALD using $\text{Ni}(\text{acac})_2(\text{tmeda})$ and $\text{N}_2\text{H}_4$

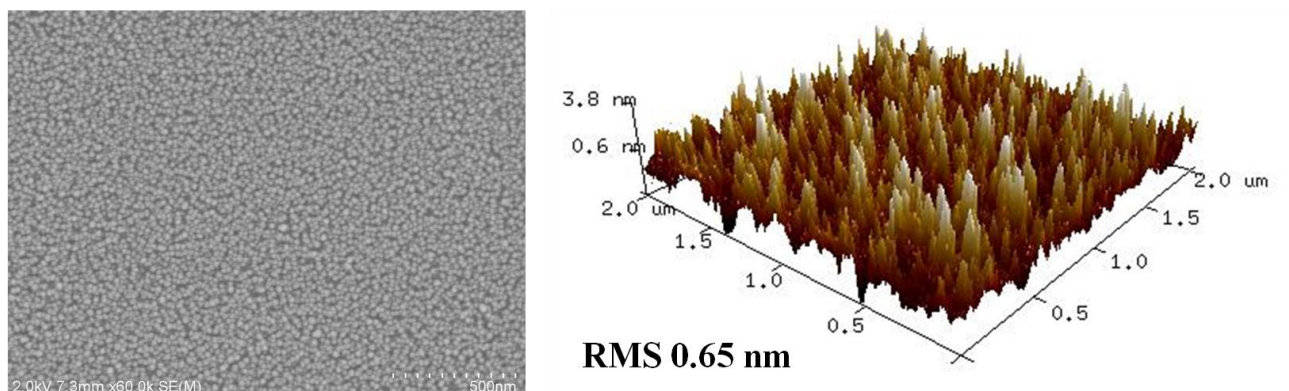

Fig. S4 SEM (left) and AFM (right) of Ni film grown at 260 °C.

As seen in Fig. S4, the film deposited at 260 °C is continuous and composed of grains, and the root-meansquare (RMS) roughness about 0.65 nm of film indicates a smooth surface.

## Structure transition of electron-rich compounds

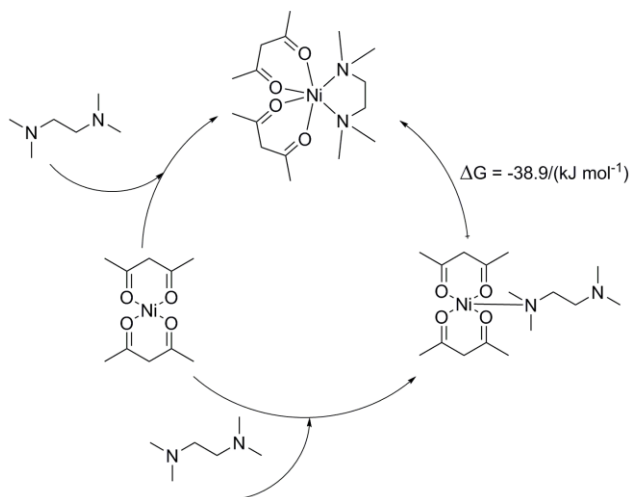

Fig. S5 Free energy for the transformation process from  $\text{Ni}(\text{acac})_2$  to  $\text{Ni}(\text{acac})_2(\text{TMEDA})$  at 298 K.

Taking  $\text{Ni}(\text{acac})_2(\text{TMEDA})$  as a sample,  $\text{Ni}(\text{acac})_2$  initially reacts with TMEDA and form a pentacoordinate intermediate, and then form a hexacoordinate compound ( $\text{Ni}(\text{acac})_2(\text{TMEDA})$ ). It is found that the total  $\Delta G$  for transition of  $\text{Ni}(\text{acac})_2(\text{TMEDA})$  from hexacoordinate to pentacoordinate at 298 K is  $38.9 \text{ KJ mol}^{-1}$ , which suggests that the transformation process is possible with some addition thermal energy. Therefore, in the temperature range of ALD, one of the N atom can break away from  $\text{Ni}(\text{acac})_2(\text{TMEDA})$  and form a pentacoordinate intermediate.<sup>11</sup>

# ALD process of Ni film grown by thermal ALD using $\text{Ni}(\text{acac})_2(\text{py})_2$ and $\text{N}_2\text{H}_4$

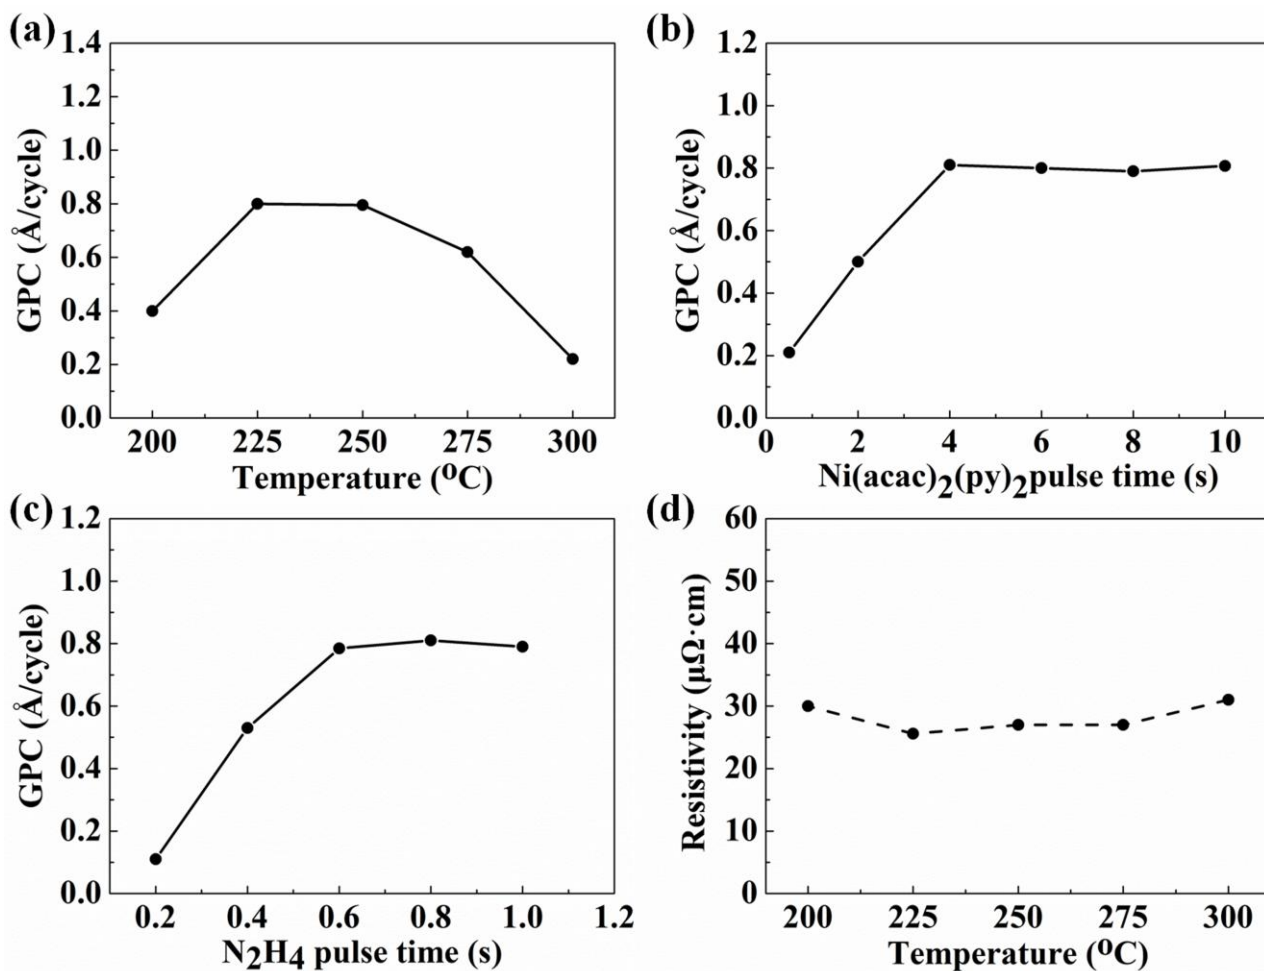

Fig. S6 (a) GPC of Ni film as a function of deposition temperature at a fixed  $\text{Ni}(\text{acac})_2(\text{py})_2$  pulse time of 10 s and  $\text{N}_2\text{H}_4$  pulse time of 2 s. (b) GPC of Ni film versus  $\text{Ni}(\text{acac})_2(\text{py})_2$  pulse time at 250 °C with a fixed  $\text{N}_2\text{H}_4$  pulse time of 2 s. (c) GPC of Ni film versus  $\text{N}_2\text{H}_4$  pulse time at 250 °C with a fixed  $\text{Ni}(\text{acac})_2(\text{py})_2$  pulse time of 10 s. (d) Resistivity of Ni film as a function of deposition temperature at a fixed  $\text{Ni}(\text{acac})_2(\text{py})_2$  pulse time of 10 s and  $\text{N}_2\text{H}_4$  pulse time of 2 s.

Fig. S6a shows plots of GPC value versus deposition temperature with  $\text{Ni}(\text{acac})_2(\text{py})_2$  (10 s) and  $\text{N}_2\text{H}_4$  (2 s). It is found that a stable value (0.79 Å/cycle) is achieved between 225 and 250 °C. Obviously, the temperature of 225-250 °C should be an ALD window in this process. The GPC value decreases at > 250 °C, mostly likely because of the desorption of precursor.<sup>12,13</sup> Fig. S6b shows plots of GPC value versus pulse time of  $\text{Ni}(\text{acac})_2(\text{py})_2$  at 250 °C. The GPC value achieves a saturated value (0.79 Å/cycle) when the pulse time of  $\text{Ni}(\text{acac})_2(\text{py})_2$  exceeds 4 s. Similar, a saturated value (0.80 Å/cycle) is achieved when the  $\text{N}_2\text{H}_4$  pulse

time exceeds 0.6 s (Fig. S6c). Certainly, these experiment datas demonstrate that this process is a typical ALD process.

Moreover, the resistivity of deposited films were measured about 25.7-31.1  $\mu\Omega\cdot\text{cm}$  (Fig. S6d).

## REFERENCES

- 1 W. Kaschube, K. R. Pörschke and G. Wilke, *J. Organomet. Chem.*, 1988, **355**, 525.
- 2 P. O. Dunstan, *Thermochim. Acta*, 1998, **317**, 165.
- 3 A. Lennartson, L. U. Christensen, C. J. McKenzie and U. G. Nielsen, *Inorg. Chem.*, 2014, **53**, 399.
- 4 G. Marcotrigiano, R. Battistuzzi and G. C. Pellacani, *Can. J. Chem.*, 1972, **50**, 2557.
- 5 L. C. A. van den Oetelaar, A. Partridge, S. L. G. Toussaint, C. F. J. Flipse and H. H. Brongersma, *J. Phys. Chem. B*, 1998, **102**, 9541.
- 6 Y. Saito, T. Takeuchi, Y. Fukuda and K. Sone, *Bull. Chem. Soc. Jpn.*, 1981, **54**, 196.
- 7 W.-H. Kim, H.-B.-R. Lee, K. Heo, Y. K. Lee, T.-M. Chung, C. G. Kim, S. Hong, J. Heo and H. Kim, *J. Electrochem. Soc.*, 2011, **158**, D1.
- 8 A. P. Grosvenor, M. C. Biesinger, R. Smart and N. S. McIntyre, *Surf. Sci.*, 2006, **600**, 1771.
- 9 Y.-P. Wang, Z.-J. Ding, Q.-X. Liu, W.-J. Liu, S.-J. Ding and D. W. Zhang, *J. Mater. Chem. C*, 2016, **4**, 11059.
- 10 L. Brissonneau, D. D. Caro, D. Boursier, R. Madar and C. Vahlas, *Chem. Vap. Deposition*, 1999, **5**, 143.
- 11 A. Zeller, E. Herdtweck and T. Strassner, *Inorg. Chem. Commun.*, 2004, **7**, 296.
- 12 J. P. Klesko, M. M. Kerrigan and C. H. Winter, *Chem. Mater.*, 2016, **28**, 700.
- 13 T. Suntola, *Thin Solid Films*, 1992, **216**, 84.
